# Supplementary material for: The application of full-size three-dimensional individual printed model combined with three-dimensional digital demonstration can facilitate patient’s preoperative comprehension to robotic-assisted laparoscopic partial nephrectomy
Source: Perioper Med (Lond). 2022 Jun 28;11:22. doi: 10.1186/s13741-022-00256-1 (PMC9238097; doi:10.1186/s13741-022-00256-1)
Supplement: Supplementary file 3 — Additional file 3. Research data. [file 13741_2022_256_MOESM3_ESM.xlsx]

## Sheet: Sheet1
patient	gender	age	side	height	weight	BMI	polar	tumor size	ASA	PADUA	RENAL	tumer nature	EduLevelPts	EduLevelCAIFM	NatureCAIFM	TotalPCSPtsCT	SubPCSPtsCT1	SubPCSPtsCT2	SubPCSPtsCT3	SubPCSPtsCT4	SubPCSPtsCT5	TotalPCSPts3D	SubPCSPts3D1	SubPCSPts3D2	SubPCSPts3D3	SubPCSPts3D4	SubPCSPts3D5	TotalPCSCAIFMCT	SubPCSCAIFMCT1	SubPCSCAIFMCT2	SubPCSCAIFMCT3	SubPCSCAIFMCT4	SubPCSCAIFMCT5	TotalPCSCAIFM3D	SubPCSCAIFM3D1	SubPCSCAIFM3D2	SubPCSCAIFM3D3	SubPCSCAIFM3D4	SubPCSCAIFM3D5
No.1	female	54	left	1.58	62	24.8358	Upper pole	2.7	1	9	5	Exophytic	High school	High school	Spouse	32	9	7	6	7	3	39	10	9	8	8	4	32	9	7	6	7	3	40	10	9	8	8	5
No.2	male	66	right	1.72	73	24.6755	Central	4.1	2	10	9	Exophytic	High school	High school	Spouse	31	8	8	5	6	4	39	10	9	8	7	5	30	8	8	5	6	3	40	10	9	8	8	5
No.3	male	62	right	1.73	82	27.3982	Upper pole	4	2	9	8	Exophytic	High school	High school	Spouse	35	8	8	7	8	4	41	9	10	8	9	5	34	8	8	7	8	3	41	9	10	8	9	5
No.4	female	56	right	1.66	64	23.2254	Lower pole	3.8	2	7	6	Exophytic	High school	High school	Spouse	33	8	7	7	8	3	39	10	8	8	9	4	33	8	7	7	8	3	43	11	8	9	9	6
No.5	male	73	left	1.69	79	27.6601	Upper pole	2.5	3	6	4	Exophytic	College	College	Son	37	9	8	8	8	4	43	11	9	10	8	5	38	9	9	7	9	4	44	11	9	10	8	5
No.6	male	55	left	1.79	87	27.1527	Central	3.2	1	11	10	Endophytic	College	College	Son	39	9	9	8	8	5	44	11	10	8	10	5	40	9	9	8	8	5	45	11	10	8	10	5
No.7	male	59	left	1.74	78	25.763	Upper pole	4.1	2	8	7	Exophytic	College	College	Daughter	37	8	8	9	8	4	45	11	10	9	10	5	37	8	8	8	9	4	46	12	10	9	10	5
No.8	female	67	right	1.6	59	23.0469	Upper pole	4.9	2	9	6	Exophytic	High school	High school	Daughter	31	7	8	7	6	3	39	9	9	8	9	4	34	7	8	8	8	3	40	8	9	8	9	6
No.9	male	50	right	1.82	99	29.8877	Central	3.4	2	9	8	Exophytic	High school	College	Son	34	7	8	8	7	4	41	8	9	10	9	5	35	8	8	7	8	4	39	8	9	8	9	5
No.10	male	53	right	1.8	90	27.7778	Upper pole	6.3	3	10	9	Exophytic	High school	High school	Daughter	33	6	7	9	8	3	39	9	8	9	9	4	35	6	8	9	8	4	43	11	8	9	10	5
No.11	male	52	left	1.75	88	28.7347	Lower pole	4	2	10	9	Exophytic	Below high school	High school	Son	32	8	6	7	7	4	37	9	7	8	8	5	34	9	6	8	7	4	39	10	8	8	9	4
No.12	female	41	right	1.6	67	26.1719	Central	1.7	1	10	8	Endophytic	High school	High school	Daughter	35	7	8	9	7	4	42	10	10	10	7	5	36	8	8	9	7	4	43	10	10	10	8	5
No.13	male	65	left	1.72	77	26.0276	Upper pole	3.1	3	9	6	Exophytic	College	College	Son	39	10	9	8	8	4	46	11	11	8	11	5	40	10	9	8	8	5	47	11	11	9	11	5
No.14	male	62	right	1.79	83	25.9043	Lower pole	2.8	2	9	8	Endophytic	College	College	Spouse	38	9	9	8	9	3	45	12	10	9	10	4	39	9	9	8	9	4	46	12	10	9	10	5
No.15	female	57	left	1.62	65	24.7676	Upper pole	3.3	2	8	7	Exophytic	High school	High school	Spouse	32	7	7	7	8	3	43	10	10	8	9	6	33	8	8	6	8	3	40	9	9	8	9	5
No.16	female	58	right	1.63	62	23.3355	Central	3	2	11	10	Endophytic	College	High school	Daughter	37	9	9	6	8	5	47	11	11	9	10	6	34	7	7	7	8	5	41	10	9	8	9	5
No.17	male	65	left	1.73	81	27.0641	Lower pole	4.4	2	10	9	Endophytic	High school	College	Spouse	33	7	7	7	8	4	40	10	9	8	8	5	34	8	7	7	8	4	42	10	10	8	8	6
No.18	female	49	right	1.55	67	27.8876	Upper pole	5.2	1	9	8	Exophytic	College	College	Spouse	40	10	9	8	9	4	48	12	10	9	11	6	38	9	9	7	9	4	46	11	10	10	10	5
No.19	female	63	left	1.58	72	28.8415	Lower pole	2.7	2	8	7	Exophytic	High school	College	Spouse	35	8	8	7	8	4	43	10	10	9	9	5	36	8	8	8	9	3	44	10	9	10	10	5
No.20	male	67	left	1.69	71	24.8591	Central	3.6	3	8	7	Exophytic	Below high school	High school	Spouse	34	6	8	8	7	5	46	11	10	9	10	6	33	7	8	8	7	3	47	11	10	10	10	6
No.21	female	53	right	1.6	72	28.125	Lower pole	5.5	2	11	9	Exophytic	College	College	Spouse	42	10	10	9	9	4	48	12	11	9	10	6	41	10	10	8	8	5	49	12	11	9	11	6
No.22	male	62	right	1.73	83	27.7323	Upper pole	4	2	7	6	Exophytic	High school	College	Spouse	35	6	9	8	8	4	43	11	9	9	9	5	34	7	8	8	8	3	44	10	10	9	10	5
No.23	female	56	left	1.66	62	22.4996	Central	4.4	2	9	7	Exophytic	High school	College	Spouse	33	6	8	8	8	3	41	10	8	9	9	5	36	6	9	8	9	4	41	9	9	9	9	5
No.24	male	74	right	1.78	85	26.8274	Upper pole	5.8	3	10	9	Exophytic	College	College	Son	37	8	9	7	9	4	44	11	10	8	10	5	37	9	9	7	9	3	46	11	10	9	10	6
No.25	female	68	left	1.59	67	26.5021	Central	2.8	2	11	10	Endophytic	High school	High school	Spouse	33	7	8	8	8	2	39	10	8	8	8	5	33	6	8	8	8	3	40	10	9	8	8	5
No.26	male	59	right	1.74	75	24.7721	Upper pole	2.1	2	8	6	Exophytic	College	College	Spouse	40	10	8	9	9	4	45	11	10	9	10	5	39	10	8	8	9	4	45	11	10	10	10	4
No.27	female	39	right	1.63	59	22.2063	Central	1.9	2	10	9	Endophytic	College	College	Son	41	10	9	9	9	4	45	12	10	9	9	5	40	9	10	8	9	4	46	12	10	9	10	5
No.28	male	79	left	1.8	102	31.4815	Upper pole	4.8	2	10	8	Exophytic	High school	College	Son	35	8	7	8	9	3	41	10	9	8	9	5	36	8	7	9	9	3	41	10	9	9	9	4
No.29	male	73	right	1.79	96	29.9616	Central	4	2	10	9	Endophytic	High school	High school	Daughter	32	9	7	6	7	3	40	10	8	8	9	5	32	7	7	7	7	4	40	10	9	8	8	5
No.30	female	52	left	1.64	72	26.7698	Lower pole	4.9	2	9	8	Exophytic	College	High school	Son	38	10	8	8	9	3	42	10	8	8	9	4	38	9	9	7	9	4	44	10	9	9	10	6
No.31	male	50	left	1.67	78	27.968	Lower pole	5.4	1	8	7	Exophytic	High school	High school	Spouse	34	7	8	8	8	3	44	11	10	9	10	4	34	8	8	7	8	3	41	9	9	9	9	5
No.32	female	52	right	1.68	72	25.5102	Central	3.2	2	10	10	Endophytic	College	High school	Spouse	40	9	9	9	9	4	47	12	11	9	10	5	38	8	9	9	8	4	42	10	10	9	9	4
No.33	male	65	right	1.74	83	27.4145	Lower pole	6.8	2	9	8	Exophytic	Below high school	Below high school	Spouse	35	8	9	8	7	3	40	9	10	8	8	5	35	8	9	8	7	3	41	9	10	8	9	5
No.34	female	41	left	1.61	67	25.8478	Upper pole	4.2	1	8	7	Exophytic	College	College	Spouse	41	10	9	9	9	4	47	12	10	10	9	6	40	10	9	8	9	4	47	12	10	9	10	6
No.35	male	60	right	1.68	74	26.2188	Lower pole	4.5	2	8	8	Exophytic	High school	High school	Spouse	34	7	7	7	9	4	40	10	9	8	8	5	35	8	7	7	9	4	41	10	9	8	8	6
No.36	female	67	left	1.58	59	23.634	Central	3.3	2	9	8	Exophytic	Below high school	Below high school	Spouse	31	8	7	6	7	3	39	10	8	8	8	5	33	9	8	6	7	3	39	10	8	8	8	5
No.37	male	55	right	1.7	73	25.2595	Lower pole	3.9	2	8	7	Exophytic	College	College	Spouse	37	9	9	8	8	3	43	11	9	9	9	5	39	10	9	8	8	4	46	11	10	9	10	6
